# Supplementary material
Source: publisher site journal article supplement (https://www.spandidos-publications.com/2914/downloadSupplementary)
Supplement: Supplementary file 1 [file downloadSupplementary]

Table SVI. *MUC22* expression and association with clinicopathologic parameters in lung cancer patients.

| Characteristics   | No. of cases | <i>MUC22</i> <sup>High</sup><br>n (%) | <i>MUC22</i> <sup>Low</sup><br>n (%) | P-value                |
|-------------------|--------------|---------------------------------------|--------------------------------------|------------------------|
| Total             | 993          | 311 (31.3)                            | 682 (68.7)                           |                        |
| Sex               |              |                                       |                                      |                        |
| Male              | 593          | 143 (24.1)                            | 450 (75.9)                           | 2.1×10 <sup>-10b</sup> |
| Female            | 399          | 168 (42.1)                            | 231 (57.9)                           |                        |
| Age (years)       |              |                                       |                                      |                        |
| ≥60               | 744          | 218 (29.3)                            | 526 (70.7)                           | 0.011 <sup>a</sup>     |
| <60               | 245          | 93 (38.0)                             | 152 (62.0)                           |                        |
| Pathological type |              |                                       |                                      |                        |
| LUAD              | 499          | 251 (50.3)                            | 248 (49.7)                           | 7×10 <sup>-20b</sup>   |
| LUSC              | 494          | 60 (12.1)                             | 434 (87.9)                           |                        |
| Clinic stage      |              |                                       |                                      |                        |
| I                 | 510          | 159 (31.2)                            | 351 (68.8)                           | 0.835                  |
| LUAD              |              | 131                                   | 137                                  |                        |
| LUSC              |              | 28                                    | 214                                  |                        |
| II                | 279          | 85 (30.5)                             | 194 (69.5)                           | 0.95                   |
| LUAD              |              | 64                                    | 54                                   |                        |
| LUSC              |              | 21                                    | 140                                  |                        |
| III               | 159          | 50 (31.4)                             | 109 (68.6)                           | 0.455                  |
| LUAD              |              | 42                                    | 39                                   |                        |
| LUSC              |              | 8                                     | 70                                   |                        |
| IV                | 32           | 12 (37.5)                             | 20 (62.5)                            |                        |
| LUAD              |              | 11                                    | 14                                   |                        |
| LUSC              |              | 1                                     | 6                                    |                        |

Data were extracted from the Human Protein Atlas (HPA, <https://www.proteinatlas.org>). Patients with *MUC22*<sup>Low</sup> or *MUC22*<sup>High</sup> tumors at different stages were classified based on the cutoff value of 0.02 shown in the HPA. <sup>a</sup>P<0.05 and <sup>b</sup>P<0.001 ( $\chi^2$  tests). *MUC22*, mucin 22; LUAD, lung adenocarcinoma; LUSC, lung squamous cell carcinoma.
